# Supplementary material for: Influence of Sintering Parameters on Spectroscopic Properties of BMW: Eu3+ Ceramic Materials Prepared by HPLT Technique
Source: MDPI journal article supplement (doi:10.3390/ma15217410), 2022-10-22
Supplement: s1 [file s1]

# Influence of sintering parameters on spectroscopic properties of BMW:Eu<sup>3+</sup> ceramic materials prepared by HPLT technique

N. Miniajluk-Gawel\*, R. Tomala, B. Bondzior, P. J. Dereń

*Institute of Low Temperature and Structure Research, Polish Academy of Science, Okólna 2, 50-422 Wrocław, Poland*

*\*Correspondence: n.miniajluk@intibs.pl*

**Table S1.** The percentage distribution of the elements on the BMW:Eu-CST ceramics surface.

**a. 8GPa 700°C/time of sintering 1 min/600°C/min**

| Wt% of elements | P. 1  | P.2   | P.3   | P.4   | P.5   | P.6   | P.7   | P.8   |
|-----------------|-------|-------|-------|-------|-------|-------|-------|-------|
| O               | 16.79 | 16.76 | 14.32 | 11.46 | 11.65 | 11.85 | 13.52 | 11.08 |
| Mg              | 32.85 | 35.36 | 17.30 | 05.23 | 05.05 | 05.44 | 07.74 | 03.19 |
| Ba              | 27.41 | 27.67 | 37.55 | 29.99 | 37.12 | 32.92 | 66.82 | 40.03 |
| Eu              | 02.92 | 03.29 | 03.33 | 29.38 | 17.52 | 23.65 | 04.79 | 04.07 |
| W               | 20.02 | 16.92 | 27.48 | 23.94 | 28.66 | 26.15 | 07.13 | 41.64 |

**b. 8GPa 700°C/ time of sintering 3 min/600°C/min**

| Wt% of elements | P. 1  | P.2   | P.3   | P.4   | P.5   | P.6   | P.7   | P.8   |
|-----------------|-------|-------|-------|-------|-------|-------|-------|-------|
| O               | 14.26 | 12.67 | 12.20 | 10.84 | 12.11 | 13.53 | 11.46 | 10.18 |
| Mg              | 20.44 | 19.93 | 15.11 | 04.56 | 04.58 | 02.54 | 02.55 | 02.59 |
| Ba              | 35.60 | 36.46 | 40.58 | 35.49 | 37.53 | 71.30 | 37.75 | 37.73 |
| Eu              | 03.76 | 03.80 | 04.31 | 19.96 | 18.33 | 04.63 | 04.09 | 04.91 |
| W               | 25.95 | 27.14 | 27.81 | 29.15 | 27.45 | 08.00 | 44.14 | 44.58 |

**c. 8GPa 700°C/ time of sintering 5 min/600°C/min**

| Wt% of elements | P. 1  | P.2   | P.3   | P.4   | P.5   | P.6   | P.7   | P.8   |
|-----------------|-------|-------|-------|-------|-------|-------|-------|-------|
| O               | 23.56 | 22.62 | 21.32 | 21.33 | 19.22 | 22.66 | 23.07 | 23.07 |
| Mg              | 35.24 | 20.90 | 26.94 | 04.69 | 07.82 | 02.59 | 11.00 | 02.19 |
| Ba              | 27.16 | 37.51 | 30.98 | 36.53 | 31.35 | 66.77 | 59.71 | 65.39 |
| Eu              | 01.01 | 00.82 | 03.52 | 19.96 | 22.06 | 01.40 | 01.23 | 01.65 |
| W               | 13.03 | 18.15 | 17.24 | 17.48 | 19.55 | 06.58 | 05.00 | 07.70 |

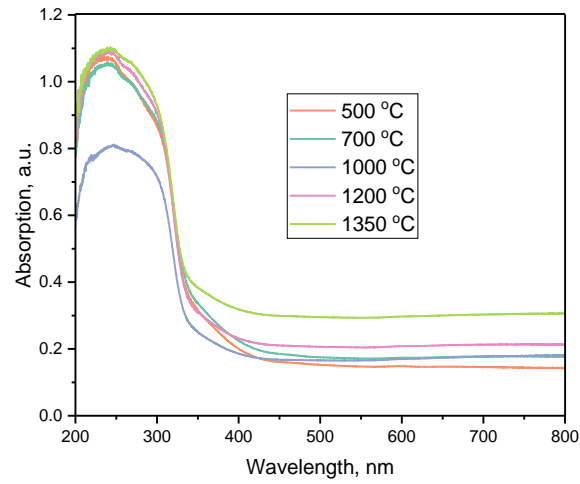

**Figure S1.** The absorption spectra of BMW:Eu-CT ceramic materials for which the temperature parameter was changed during the sintering process.

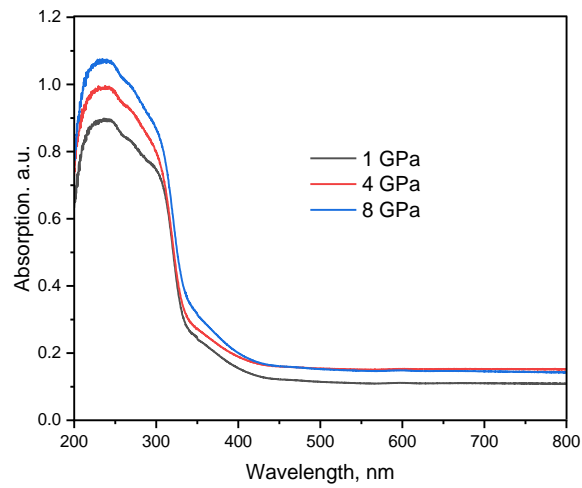

**Figure S2.** The absorption spectra of BMW:Eu-CP ceramic materials for which the pressure parameter was changed during the sintering process.

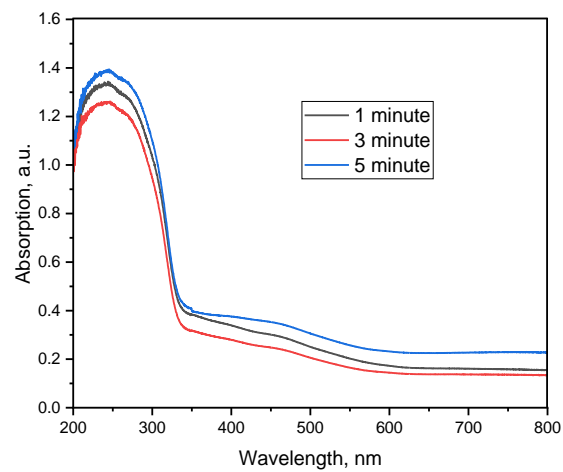

**Figure S3.** The absorption spectra of BMW:Eu-CTS ceramic materials for which the time of sintering parameter was changed during the sintering process.

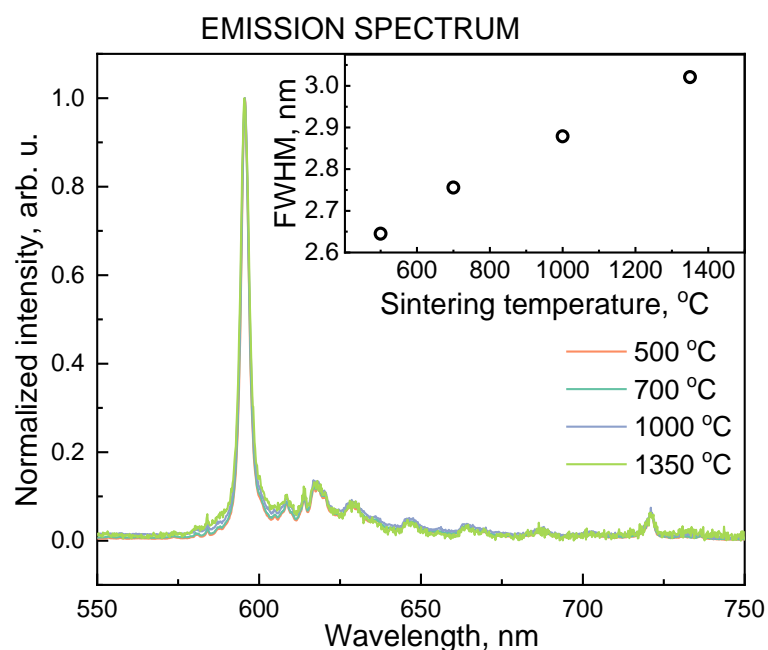

**Figure S4.** The emission spectra of BMW:Eu-CT ceramic materials for which the temperature parameter was changed during the sintering process.

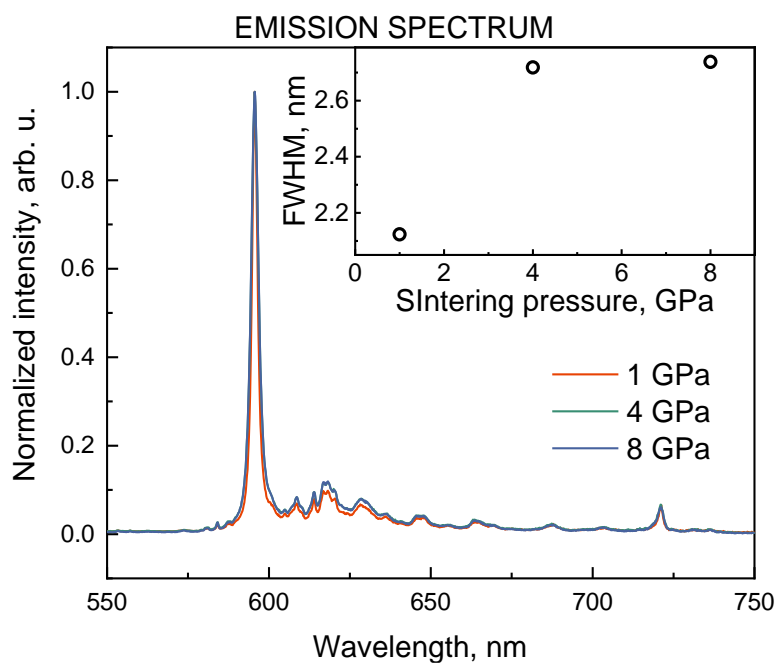

**Figure S5.** The emission spectra of BMW:Eu-CP ceramic materials for which the pressure parameter was changed during the sintering process.

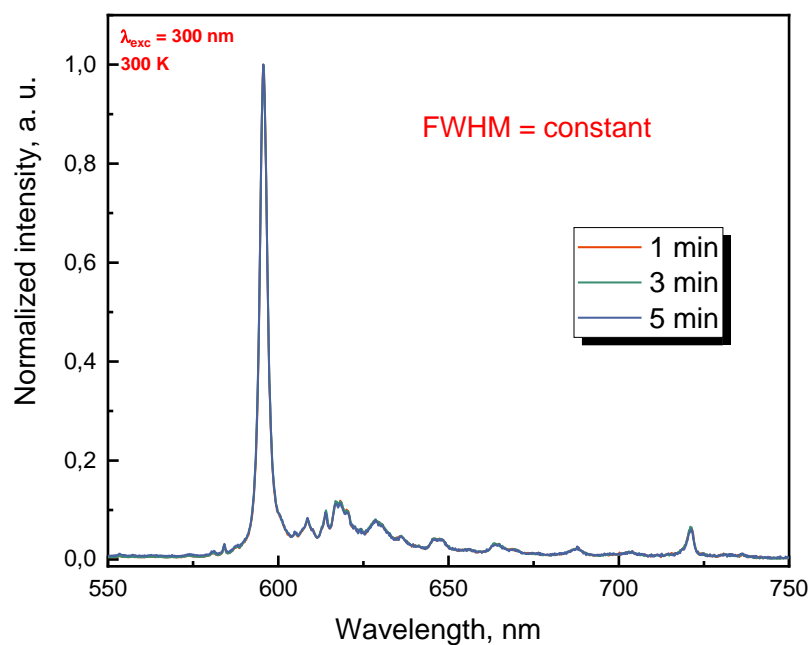

**Figure S6.** The emission spectra of BMW:Eu-CST ceramic materials for which the time of sintering parameter was changed during the sintering process.

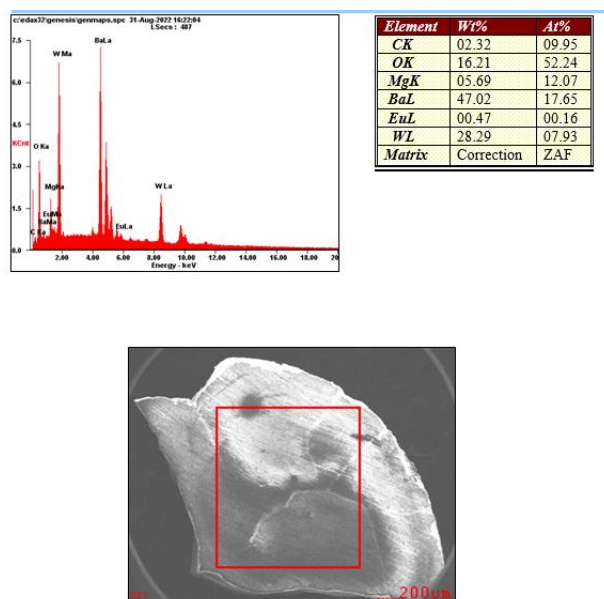

**Figure S7.** The SEM-EDS analysis of elements of BMW:Eu ceramic annealed at 1350 °C.

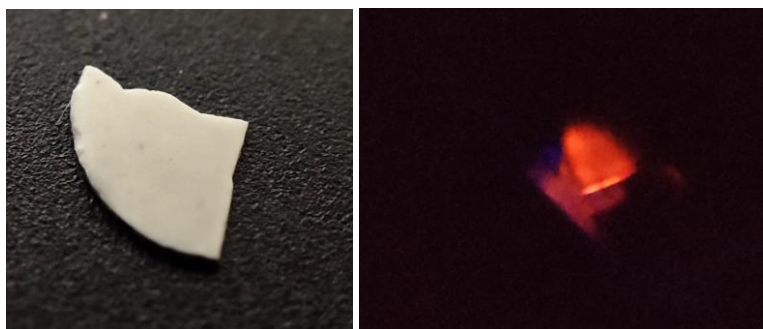

**Figure S8.** The photo of BMW:Eu ceramic obtained at 8 GPa and 500°C (left) and photo of emission of ceramic in transmittance setup, irradiated by 266 nm laser diode (right).
